# Supplementary material for: Progressive Vascular Functional and Structural Damage in a Bronchopulmonary Dysplasia Model in Preterm Rabbits Exposed to Hyperoxia
Source: MDPI journal article supplement (doi:10.3390/ijms17101776), 2016-10-24
Supplement: s1 [file s1]

# Supplementary Materials: Progressive Vascular Functional and Structural Damage in a Bronchopulmonary Dysplasia Model in Preterm Rabbits Exposed to Hyperoxia

Julio Jimenez, Jute Richter, Taro Nagatomo, Thomas Salaets, Rozenn Quarck, Allard Wagennar, Hongmei Wang, Jeroen Vanoirbeek, Jan Deprest and Jaan Toelen

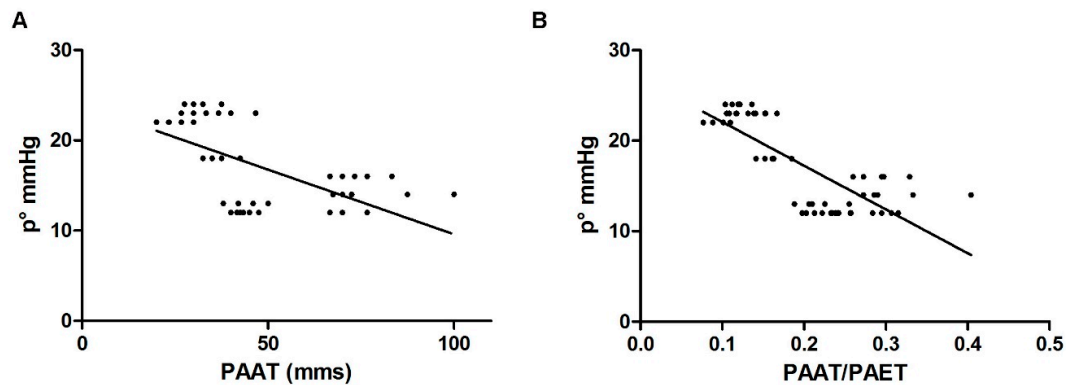

**Figure S1.** Correlation between the invasive measurement of the right ventricle systolic peak pressure and the pulmonary artery Doppler micro-ultrasound measurements **(A)** Linear regression of the right ventricle systolic peak pressure and the pulmonary artery acceleration time measured by Doppler.  $y = -0.1433x + 23.926$ ;  $R^2 = 0.329$ ; **(B)** Linear regression of the right ventricle systolic peak pressure and the pulmonary artery acceleration time and ejection time ratio measured by Doppler.  $y = -48.35x + 26.91$ ;  $R^2 = 0.621$ .  $n = 2$ .
